# Supplementary material for: Crystalline phase effects of zirconia in Ag/ZrO 2 catalysts: oxygen vacancy-mediated new pathways to promote carbon–oxygen bond hydrogenation
Source: Royal Society of Chemistry journal article supplement (doi:10.1039/d4ta05062b), 2024-01-01
Supplement: d4ta05062b1.pdf [file d4ta05062b1.pdf]

1 ***Electronic Supplementary Information***

2

3 **Crystalline phase effects of zirconia in Ag/ZrO<sub>2</sub> catalyst: oxygen vacancy-mediated new**  
4 **pathways to promote carbon-oxygen bonds hydrogenation**

5

6 Menghan Guo<sup>1</sup>, Xiaofang Shang<sup>1</sup>, Jiawei Li, Chenxi Yang, Jie Ding\*, Qin Zhong\*, Yixin Chen

7

8 School of Chemistry and Chemical Engineering, Nanjing University of Science and Technology, Nanjing,  
9 Jiangsu Province, 210094, PR China

10

11 \* Corresponding author. E-mail address: zq304@njust.edu.cn (Q. Zhong), tonlyjding@njust.edu.cn (J. Ding).

12 <sup>1</sup> These authors contributed equally to this work and should be considered co-first authors.

13

14

## 15 **Catalytic characterisation**

16 The X-ray diffraction (XRD) patterns of the samples were obtained using a D2 PHASER (Bruker,  
17 Germany) equipped with Cu K $\alpha$  radiation. The data were collected at 5°-80° with a step size of 0.01°.

18 The nitrogen adsorption-desorption isotherm was determined utilising an automatic aperture analyser  
19 (Micromeritics, ASAP 2460). Prior to the commencement of the test, all samples were subjected to a drying  
20 process at 120 °C for a period of 24 h and a degassing process at 300 °C for a further 6 h. The total specific  
21 surface area ( $S_{\text{BET}}$ ) was determined by a multipoint BET method. The single-point pore volume was estimated  
22 from the amount adsorbed at a relative pressure of 0.99.

23 The morphology was investigated using field emission scanning transmission microscopy (SEM,  
24 Regulus-8100, HITACHI, Japan) and transmission electron microscopy (TEM, HT-7800, HITACHI, Japan).

25 The surface chemical environments of the samples were determined by X-ray photoelectron spectroscopy  
26 (XPS, AXIS ULTRA DLD, Shimadzu, Japan) with Al K $\alpha$  radiation ( $h\nu = 1486.6$  eV), and all the data were  
27 corrected by the C 1s adventitious located at 284.4 eV.

28 Fourier-transform infrared (FTIR) spectra were recorded in the 4000-400  $\text{cm}^{-1}$  range on a Thermo fisher  
29 Nicolet iS10 spectrometer equipped with a deuterated tri-glycine sulfate (DTGS) detector with fast recovery.  
30 The powder samples were mixed with KBr (2 wt.%) and pressed into translucent disks at room temperature.

31 The UV-vis diffuse reflectance spectra (UV-vis DRS) was characterised through a Shimadzu UV-2600  
32 UV-vis spectrophotometer, with a test range of 800-220 nm.

33 The thermal decomposition products of the samples were analysed using a TPR-20 EGA (Hiden  
34 Analytical) mass spectrometer in multi-ion detection mode.

35 Electron paramagnetic resonance spectroscopy (EPR, Bruker) is employed to quantify single-electron  
36 structures, including free radicals, transition metal ions, polymorphic molecules, and crystal defects, among  
37 others, in samples.

38 Thermogravimetric curves were obtained for the samples on a thermogravimetric analyser (SDT Q600,  
39 Simultaneous DSC-TGA Q Series, TA Instruments-Waters LLC, USA). Given that the mass of the sample  
40 remains relatively constant, the derivative of the mass taken in the vertical coordinate is employed to enhance  
41 the results. The mass of all the samples tested was taken as 3 mg.

42

## 43 **In-situ FTIR experiments**

44 In-situ Fourier transform infrared spectroscopy (in-situ FTIR) of DEO was performed on a Thermo fisher  
45 Nicolet iS10 spectrometer equipped with a liquid-nitrogen-cooled mercury cadmium telluride (MCT) narrow-

46 band detector and a modified In-situ reaction cell. The spectra were recorded in a cumulative manner, with 32  
47 scans at a resolution of  $4\text{ cm}^{-1}$ .

48 The detailed pre-treatment and test conditions are given as follows. Firstly, about 100 mg of sample was  
49 carefully put onto the support copper net of reaction cell. Afterwards, the sample was pre-reduced in a  $\text{N}_2$  flow  
50 ( $30\text{ mL}\cdot\text{min}^{-1}$ ) at  $300\text{ }^\circ\text{C}$  with a heating rate of  $10\text{ }^\circ\text{C}\cdot\text{min}^{-1}$  for 2 h. In this process, the background spectrum  
51 was collected. Subsequently, the line was switched, with the DEO liquid in the bubbler bottle being carried  
52 by  $\text{N}_2$  into the reaction cell. FTIR spectra were collected at 10 min intervals over a period of 2 h.

## 54 **$\text{H}_2$ -TPR experiments**

55 Hydrogen temperature-programmed reduction ( $\text{H}_2$ -TPR) was conducted on an automated catalyst  
56 characterisation system (Micromeritics, AutoChem II 2920, America) equipped with a TCD detector.

57 In a typical experiment, 100 mg of the ground sample was added to the tube via a long-necked funnel.  
58 The sample (100 mg) was subjected to a pretreatment at  $120\text{ }^\circ\text{C}$  ( $\text{Ag}_2\text{O}$  decomposes spontaneously at high  
59 temperatures) for one hour in an argon atmosphere ( $50\text{ mL}\cdot\text{min}^{-1}$ ), after which it was cooled to  $50\text{ }^\circ\text{C}$ .  
60 Subsequently, the carrier gas was replaced with a 10 vol.%  $\text{H}_2/\text{Ar}$  mixture at a flow rate of  $50\text{ mL}\cdot\text{min}^{-1}$ . The  
61 sample was then heated to  $800\text{ }^\circ\text{C}$  at a rate of  $10\text{ }^\circ\text{C}\cdot\text{min}^{-1}$ , and the TCD signals were recorded. The water and  
62 carbon dioxide generated during the experiment were removed by means of a 5A molecular sieve.

## 64 **DFT calculation**

65 First-principle theoretical calculations at the density functional theory (DFT) level are conducted. Spin-  
66 polarized DFT calculations are performed utilizing the Vienna Ab-initio Simulation Package (VASP, Version  
67 5.4.4) [1] The Perdew-Burke-Ernzerhof (PBE) functional within the generalized gradient approximation  
68 (GGA) [2, 3] is utilized to describe electronic exchange and correlation. To rectify the self-interaction error  
69 of GGA, Hubbard U corrections (DFT+U) approach is employed with the  $U_{\text{eff}} = 2\text{ eV}$  to the Zr 4d orbitals  
70 according to the previous studies [4]. The cell model  $\text{ZrO}_2$  is downloaded from materials project (mp-2858,  $a$   
71  $= 5.234\text{ \AA}$ ,  $b = 5.269\text{ \AA}$ ,  $c = 5.418\text{ \AA}$ ,  $\alpha = \gamma = 90^\circ$ ,  $\beta = 100^\circ$ , space group =  $\text{P}2_1/\text{c}$ ). For the cell parameter  
72 optimization, the interaction between core and electrons is described using the projector-augmented wave  
73 approach with cut-off energy of 450 eV. The van-der Waals interactions are corrected by the Grimme's DFT-  
74 D3 method [5]. A  $4\times 4\times 4$  Monkhorst-Pack (M-P) k-point grid is used to optimize cell parameters and static  
75 analysis. All the spin-polarized calculation is conducted with magnetic moment parameters.

76 By cleaving the (-111) facet of optimized  $\text{ZrO}_2$  cell, a  $3\times 2\times 1$  supercell model is constructed ( $a = 20.313$   
77  $\text{\AA}$ ,  $b = 14.718\text{ \AA}$ ,  $c = 20.695\text{ \AA}$ ,  $\alpha = \beta = 90^\circ$ ,  $\gamma = 64^\circ$ ). The construction of  $\text{ZrO}_2$  models with oxygen vacancies

78 involved the removal of bridging oxygen or tridentate oxygen on the slab model, resulting in two structural  
 79  $ZrO_2$  models with oxygen vacancies. A  $1 \times 2 \times 1$  k-point mesh centered around the gamma point is conducted  
 80 to optimize the slab model. To prevent interactions between different models along the Z-axis, a vacuum layer  
 81 with a thickness of 15 Å is implemented. In these surface models, the bottom periodic layer is fixed to maintain  
 82 the bulk structure, while all other atoms are allowed to fully relax. Atomic structures are optimized with the  
 83 electronic and ionic relaxation thresholds set at  $10^{-5}$  eV and  $20 \text{ meV} \cdot \text{Å}^{-1}$ , respectively. Fig. S1 shows the cell  
 84 with fully optimized parameters, and the cell parameter was fully optimized.

85 The adsorption energy ( $E_{\text{ads}}$ ) of DEO on  $ZrO_2$  were calculated as follows:

$$86 \quad E_{\text{ads}} = E_{\text{DEO-slab}} - E_{\text{DEO}} - E_{\text{slab}}$$

87 Where,  $E_{\text{DEO-slab}}$ ,  $E_{\text{DEO}}$  and  $E_{\text{slab}}$  are total energy for the slab model of  $ZrO_2$  with DEO, the optimized DEO  
 88 model and the slab model of  $ZrO_2$ .

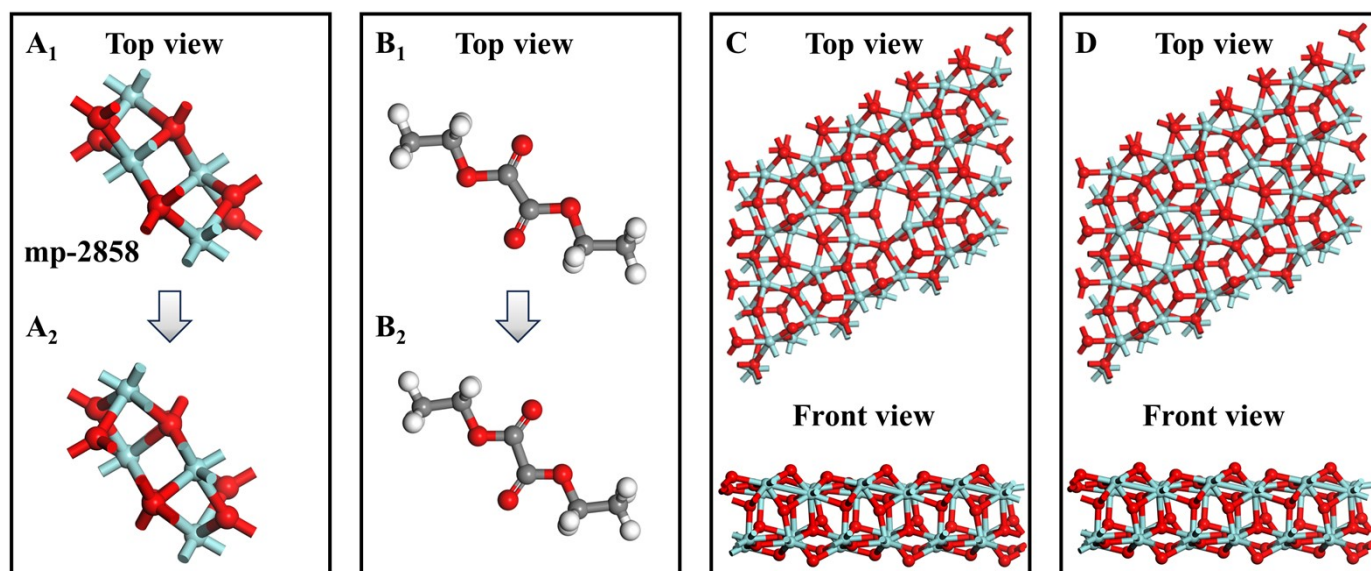

89  
 90 **Fig. S1.** (A<sub>1</sub>) Cell model of  $ZrO_2$  and (A<sub>2</sub>) the optimized model of  $ZrO_2$ . (B<sub>1</sub>) The initial DEO model and (B<sub>2</sub>)  
 91 the optimized DEO module. The slab model of  $ZrO_2$  with (C) tridentate bridging oxygen vacancies and (D)  
 92 bridging oxygen vacancies ( $3 \times 2 \times 1$  supercell model). The colors of the atoms are designated as follows: O  
 93 (red), Zr (cyan), C (dark grey) and H (white).  
 94  
 95

| Abbreviation                                          | Full name or details                                                             |
|-------------------------------------------------------|----------------------------------------------------------------------------------|
| DEO                                                   | Diethyl oxalate                                                                  |
| EGly                                                  | Ethyl glycolate                                                                  |
| EG                                                    | Ethylene glycol                                                                  |
| LHSV                                                  | Liquid hourly space velocity                                                     |
| A/B                                                   | A load on B, A is usually a metal, B is a support                                |
| Zr-NH <sub>4</sub> <sup>+</sup>                       | Monoclinic phase zirconia prepared with ammonium carbonate as precipitant        |
| Zr-Na <sup>+</sup>                                    | Tetragonal phase zirconia prepared with sodium carbonate as precipitant          |
| Zr-Na <sup>+</sup> /NH <sub>4</sub> <sup>+</sup> -X00 | X00 stands for calcination temperature                                           |
| O <sub>v</sub>                                        | Oxygen vacancy                                                                   |
| Zr <sup>n+</sup>                                      | n takes values of 3 or 4, representing different coordination environments of Zr |
| $\nu_{as}$                                            | Symmetrical stretching vibration                                                 |
| $\nu_s$                                               | Asymmetric stretching vibration                                                  |
| $\delta_{as}$                                         | Asymmetrical deformation vibration                                               |

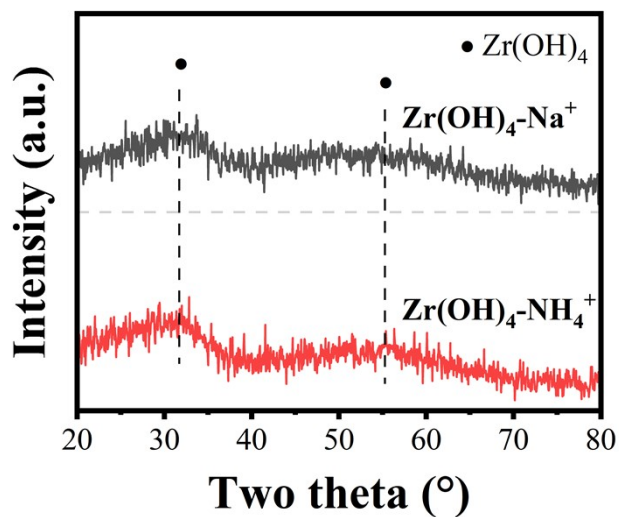

Fig. S2. XRD patterns of precursors.

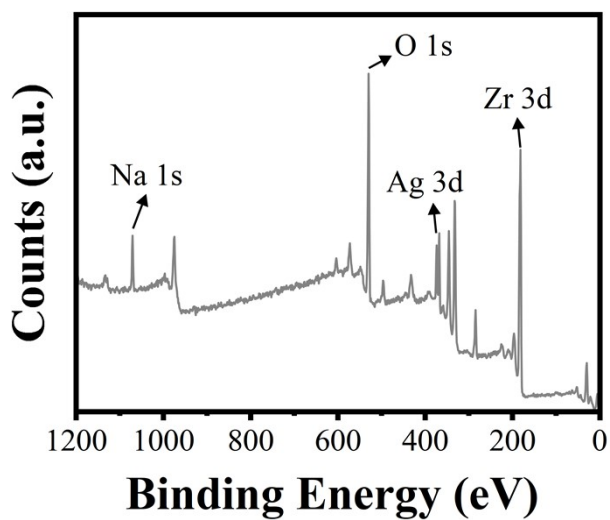

Fig. S3. The full XPS spectra of Zr- $\text{Na}^+$  catalyst.

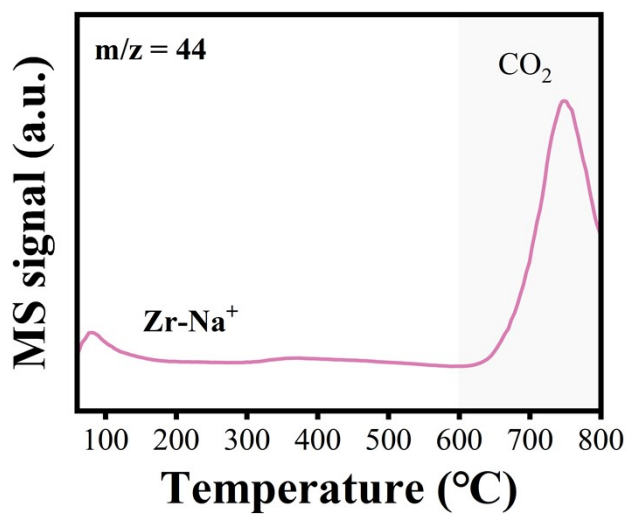

Fig. S4. The MS profiles of Zr- $\text{Na}^+$  catalyst in an atmosphere of helium.

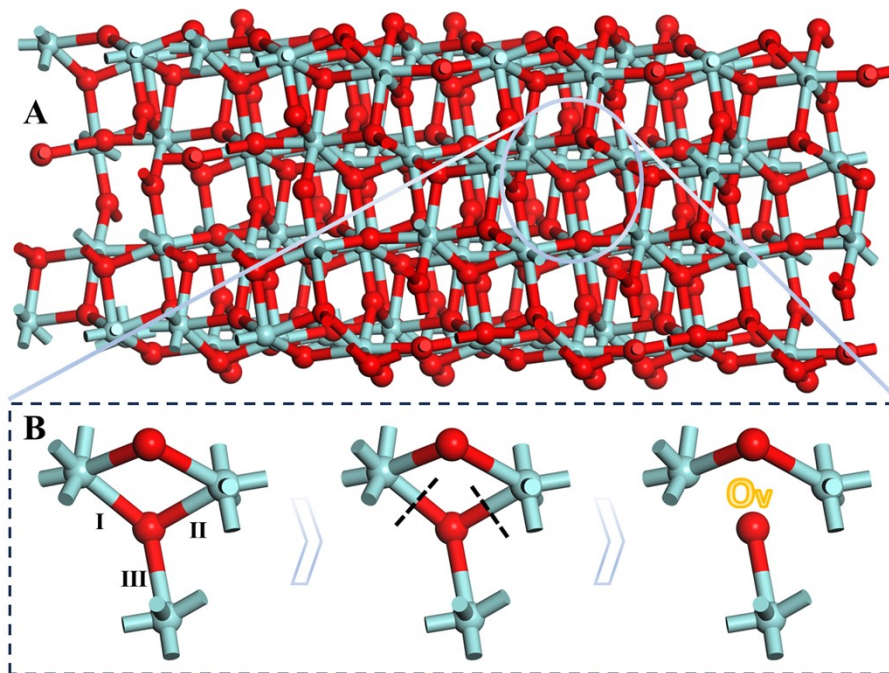

110  
 111 **Fig. S5.** (A) Crystallite structure of (-111) crystalline plane of the monoclinic zirconia. (B) One possible  
 112 pathway for the formation of Zr<sup>3+</sup>-O<sub>v</sub> cite (red for oxygen, cyan for zirconium).

113 The representative bulk-phase three-coordinated oxygen in Fig. S5A was selected as the object of study, as  
 114 illustrated in Fig. S5B. With regard to the oxygen atom in question, it can be observed that the chemical  
 115 environments of all three Zr-O bonds are distinct, and that they are designated as I, II and III, respectively. If  
 116 the Zr-O bond (III) is retained while the Zr-O bond (I) and Zr-O bond (II) are broken during the phase  
 117 transformation, an oxygen vacancy accompanied by Zr<sup>3+</sup> is generated after separation because the Zr-O bond  
 118 (I) and Zr-O bond (II) are still bridged by an oxygen atom.

119 This process represents a reasonable hypothesis regarding the experimental results, which require further  
 120 investigation and discussion.

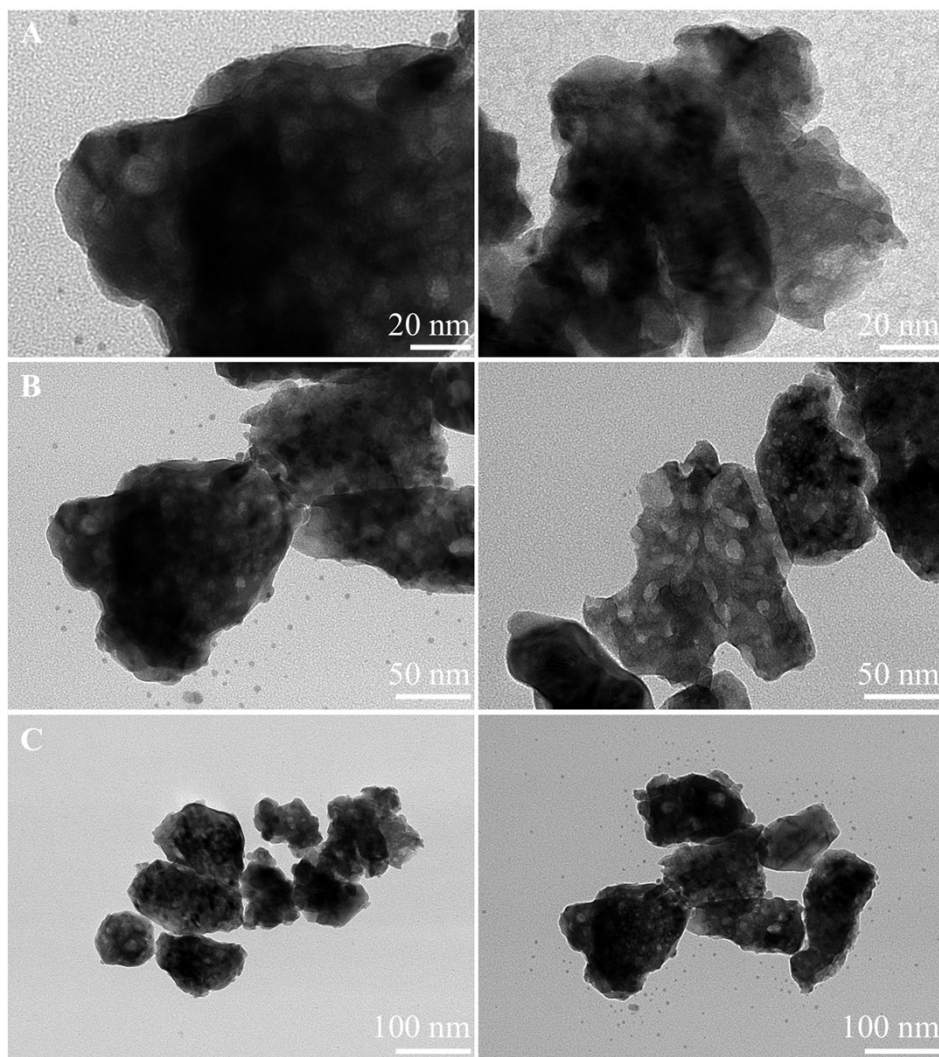

121  
122 **Fig. S6.** TEM images of Zr-Na<sup>+</sup> catalyst at (A) 20 nm, (B) 50 nm and (C) 100 nm.  
123

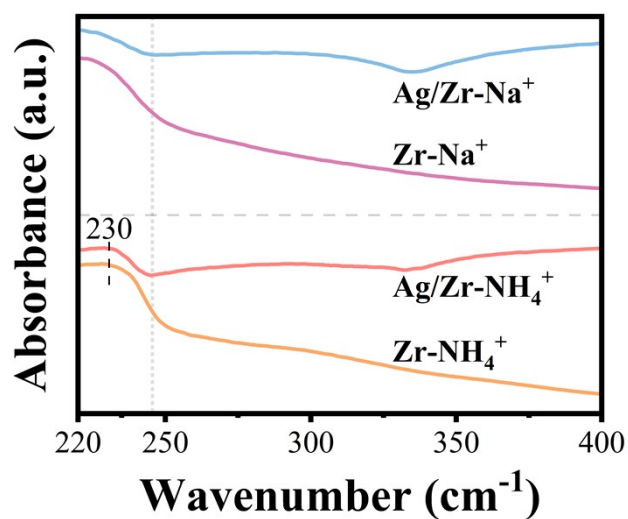

124  
125 **Fig. S7.** UV-vis DRS spectra of Zr-Na<sup>+</sup>, Zr-NH<sub>4</sub><sup>+</sup>, Ag/Zr-Na<sup>+</sup> and Ag/Zr-NH<sub>4</sub><sup>+</sup> catalysts



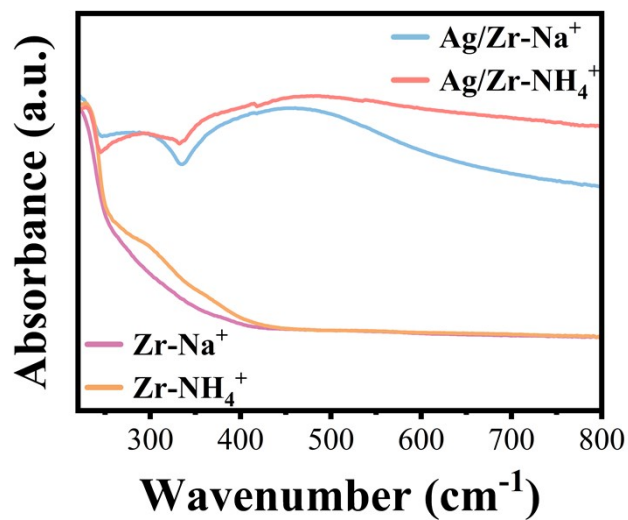

126  
127 **Fig. S8.** UV-vis DRS spectra of different materials at the same coordinate origin.  
128

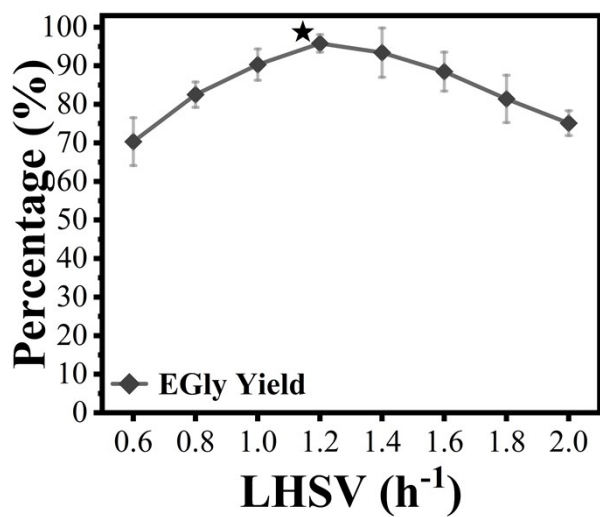

129  
130 **Fig. S9.** Effect of LHSV on the EGly yield of Ag/Zr-NH<sub>4</sub><sup>+</sup> catalyst.  
131

**Table S2** Comparison of the activity performance of silver-based catalysts

| Catalyst                                     | Con./% | Sel./% | Yield/% | P/MPa | T/°C | H <sub>2</sub> /DM(E)O | (W)LHSV/h <sup>-1</sup> | Lifetime/h | Ref.      |
|----------------------------------------------|--------|--------|---------|-------|------|------------------------|-------------------------|------------|-----------|
| DMO hydrogenation to MG                      |        |        |         |       |      |                        |                         |            |           |
| 15Ag/SiO <sub>2</sub>                        | 100    | 92     | 92      | 2.5   | 220  | 100                    | 0.2                     | 120        | [6]       |
| 10Ag/MCM-41                                  | -      | -      | 90      | 2.5   | 220  | 100                    | 0.2                     | -          | [7]       |
| 10Ag/SBA-15                                  | 99.5   | 95     | 94.5    | 3     | 200  | 100                    | 0.6                     | 100        | [8]       |
| 5Ag <sub>1</sub> -Ni <sub>0.20</sub> /SBA-15 | 97.6   | 92.8   | 90.6    | 3     | 200  | 80                     | 1                       | 140        | [9]       |
| 10Ag-in/hCNT                                 | 100    | 97     | 97      | 3     | 220  | 80                     | 0.6                     | 200        | [10]      |
| 15Ag/KCC-1                                   | 97.8   | 92.2   | 90.2    | 3     | 200  | 100                    | 1.75                    | 110        | [11]      |
| 10Ag/AC-N                                    | 100    | 95     | 95      | 3     | 220  | 80                     | 0.6                     | 150        | [12]      |
| 10%Ag/SiO <sub>2</sub>                       | 86.8   | 91.5   | 79.4    | 1.5   | 220  | 150                    | 0.28                    | 150        | [13]      |
| 10Ag/0.02Ti-KCC-1                            | 98     | 95     | 93      | 3     | 200  | 100                    | 1.75                    | 100        | [14]      |
| 3Ag/NH <sub>2</sub> -MSNS                    | 100    | 96.6   | 96.6    | 2     | 220  | 100                    | 1                       | 250        | [15]      |
| 5Ag <sub>1</sub> -Li <sub>0.05</sub> /SBA-15 | 99.45  | 82.2   | 81.75   | 3     | 200  | 80                     | 0.6                     | 200        | [16]      |
| 3Ag/MSNS_90                                  | 99.7   | 96.6   | 96.3    | 2     | 220  | 80                     | 1.25                    | 100        | [17]      |
| 1B/Ag/SiO <sub>2</sub>                       | 100    | 88.3   | 88.3    | 1.5   | 220  | 150                    | 0.28                    | 300        | [18]      |
| 10Ag-0.5%Ni/SiO <sub>2</sub>                 | 100    | 92.5   | 92.5    | 1.5   | 220  | 150                    | 0.28                    | 300        | [19]      |
| 10Ag/m-ZrO <sub>2</sub>                      | -      | -      | 98.8    | 3     | 205  | 80                     | 0.6                     | 1000       | [20]      |
| DEO hydrogenation to EGly                    |        |        |         |       |      |                        |                         |            |           |
| 30Ag-HMO                                     | 90     | 82     | 73.8    | 2.9   | 240  | -                      | -                       | 200        | [21]      |
| 10Ag/SiO <sub>2</sub> -HR                    | 95.6   | 82.9   | 79.2    | 1.5   | 160  | 200                    | 0.2                     | 100        | [22]      |
| 5Ag/Zr-NH <sub>4</sub> <sup>+</sup>          | 99.9   | 95.9   | 95.8    | 2     | 220  | 100                    | 0.5                     | 120        | This work |

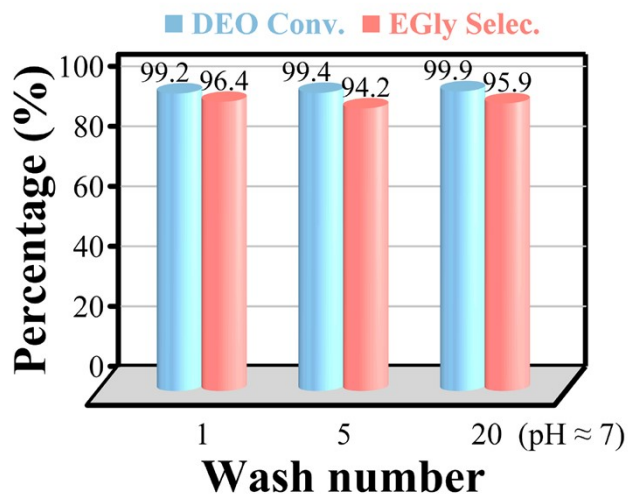

Fig. S10. Effect of wash number on the activity of Ag/Zr-Na<sup>+</sup> catalyst.

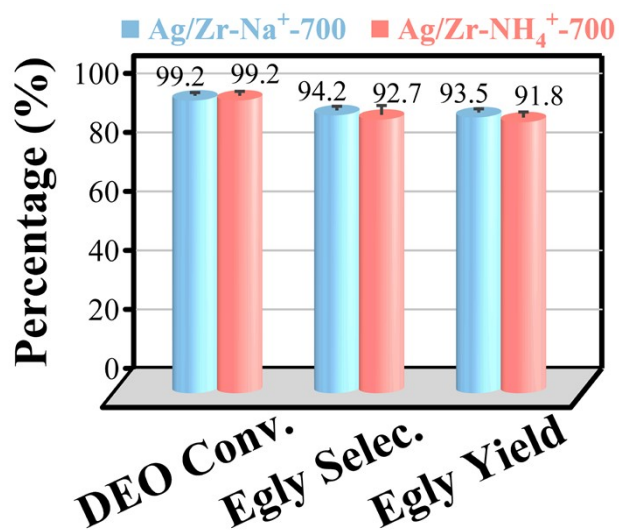

Fig. S11. Comparison of the activity of Ag/Zr-Na<sup>+</sup>-700 and Ag/Zr-NH<sub>4</sub><sup>+</sup>-700 catalysts.

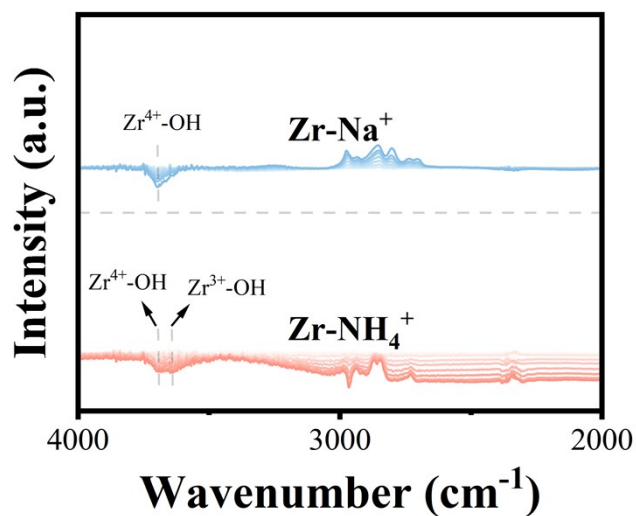

Fig. S12. In-situ adsorption FTIR of DEO on Zr-Na<sup>+</sup> and Zr-NH<sub>4</sub><sup>+</sup> catalysts.

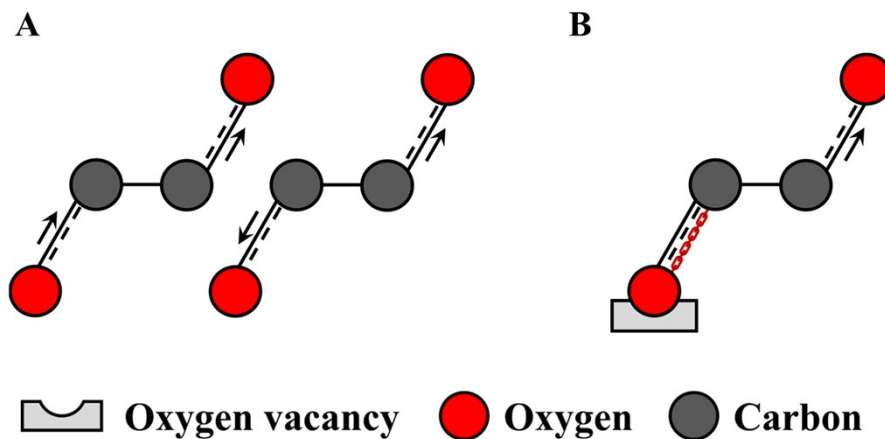

143

144 **Fig. S13.** Vibrational modelling of C=O bonds of DEO adsorbed on (A) Zr-Na<sup>+</sup> and (B) Zr-NH<sub>4</sub><sup>+</sup> catalysts.

145 The C=O bond pair adsorbed on Zr-Na<sup>+</sup> catalyst is free to vibrate, resulting in the coupling splitting into  
 146 a pair of high-energy and low-energy states. Consequently, the infrared absorption peaks of the C=O bond  
 147 exhibit a double peak. In contrast, one of the adsorbed C=O bond pairs on Zr-NH<sub>4</sub><sup>+</sup> catalyst is anchored, which  
 148 results in the synchronisation of the C=O bond pair stretching, and thus its C=O bond infrared absorption peak  
 149 is a single peak.

150 It is regrettable that we have not yet conducted a thorough investigation to substantiate this hypothesis.

151 Consequently, it is only a reasonable supposition at this stage.

152

153

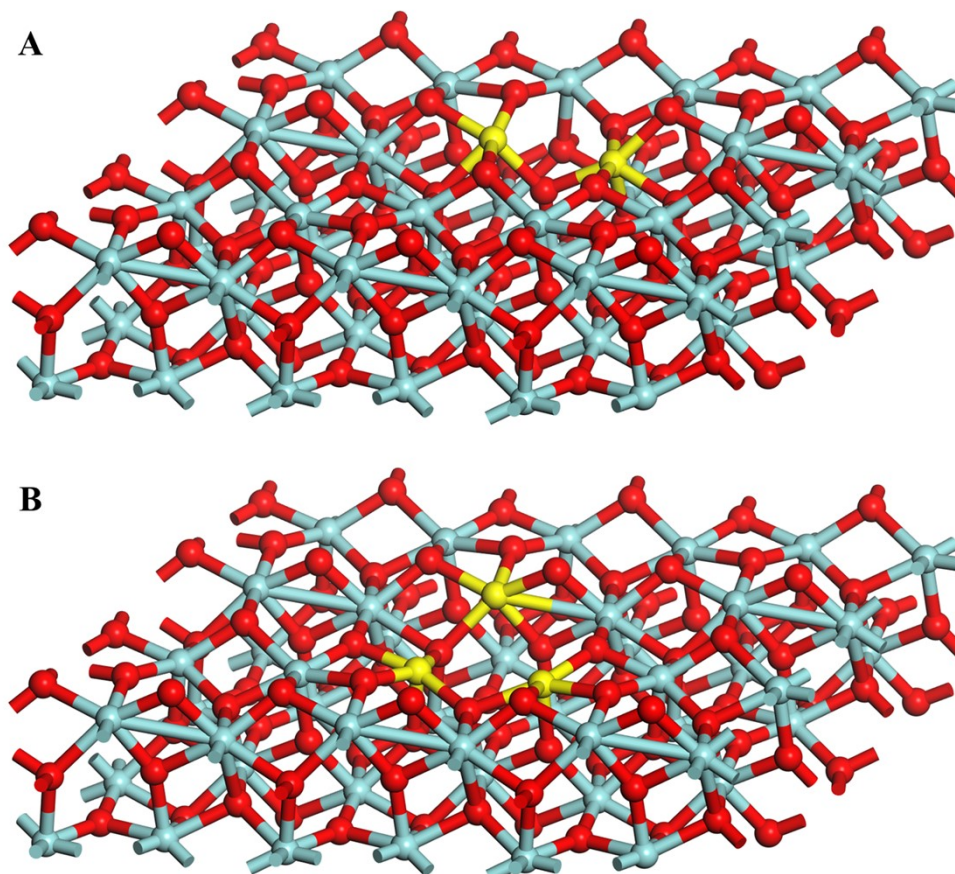

154  
 155 **Fig. S14.** (A) Two-coordinated and (B) three-coordinated oxygen vacancy on the (-111) crystalline plane of  
 156 monoclinic zirconia (red for oxygen, cyan for zirconium, yellow for zirconium adjacent to the oxygen  
 157 vacancies).

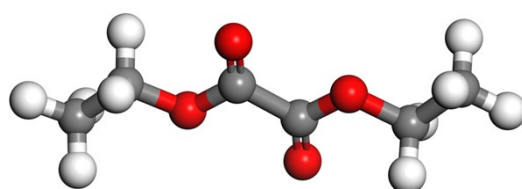

159  
 160 **Fig. S15.** The ball-and-stick model of DEO molecule (red for oxygen, dark grey for carbon, white for  
 161 hydrogen).

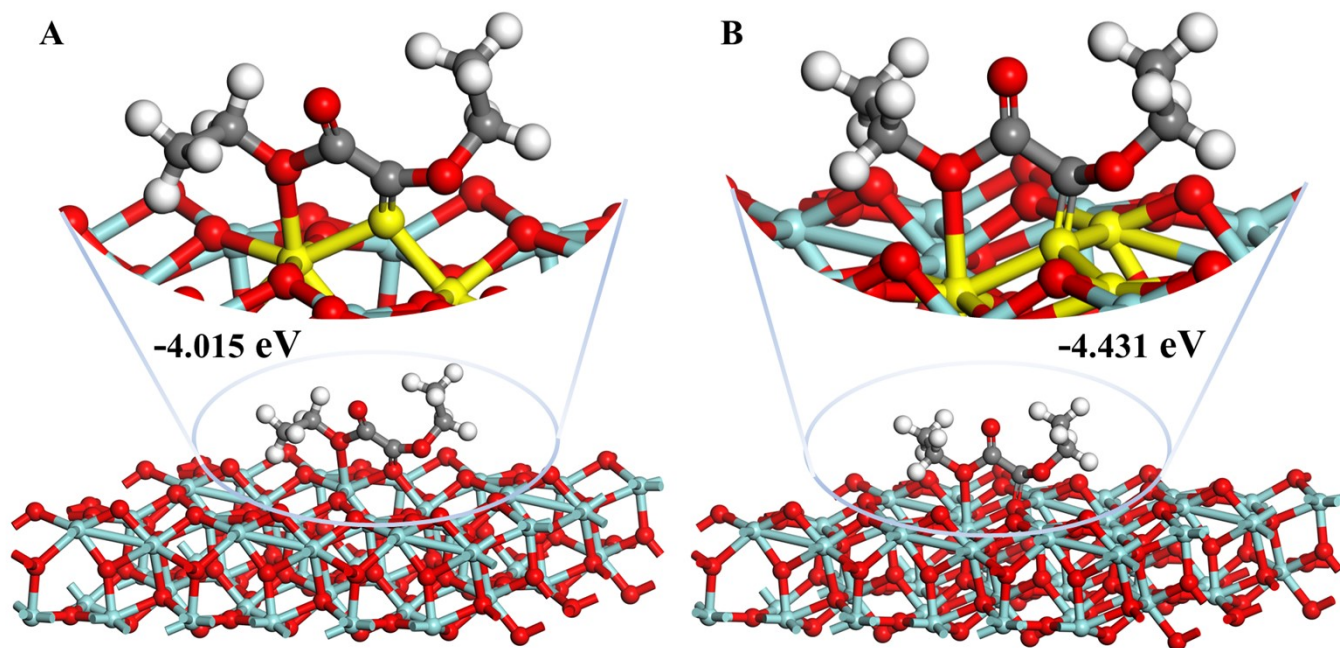

163  
164 **Fig. S16.** DEO adsorption energies of (A) two- and (B) three-coordinated oxygen vacancies on (-111)  
165 crystalline plane of monoclinic zirconia (red for oxygen, cyan for zirconium, dark grey for carbon, white for  
166 hydrogen).  
167

168 **Reference**

- 169 [1] G. Kresse, J. Furthmüller, Efficiency of ab-initio total energy calculations for metals and semiconductors  
170 using a plane-wave basis set, *Computational Materials Science*, 6 (1996) 15-50.
- 171 [2] J.P. Perdew, K. Burke, M. Ernzerhof, Generalized Gradient Approximation Made Simple, *Phys Rev Lett*,  
172 77 (1996) 3865-3868.
- 173 [3] J.P. Perdew, J.A. Chevary, S.H. Vosko, K.A. Jackson, M.R. Pederson, D.J. Singh, C. Fiolhais, Atoms,  
174 molecules, solids, and surfaces: Applications of the generalized gradient approximation for exchange and  
175 correlation, *Physical Review B*, 46 (1992) 6671-6687.
- 176 [4] R. Ansari, M. Faghihnasiri, A. Shahnazari, S. Malakpour, S. Sahmani, A DFT study of thermal effects on  
177 the elastic properties of ZrO<sub>2</sub> nanosheet, *Journal of Alloys and Compounds*, 687 (2016) 790-796.
- 178 [5] S. Grimme, J. Antony, S. Ehrlich, H. Krieg, A consistent and accurate ab initio parametrization of density  
179 functional dispersion correction (DFT-D) for the 94 elements H-Pu, *The Journal of Chemical Physics*, 132  
180 (2010).
- 181 [6] A. Yin, X. Guo, W. Dai, K. Fan, High activity and selectivity of Ag/SiO<sub>2</sub> catalyst for hydrogenation of  
182 dimethyl oxalate, *Chemical Communications*, 46 (2010) 4348-4350.
- 183 [7] A. Yin, C. Wen, W.-L. Dai, K. Fan, Ag/MCM-41 as a highly efficient mesostructured catalyst for the  
184 chemoselective synthesis of methyl glycolate and ethylene glycol, *Applied Catalysis B-Environmental*, 108  
185 (2011) 90-99.
- 186 [8] J. Zheng, H. Lin, X. Zheng, X. Duan, Y. Yuan, Highly efficient mesostructured Ag/SBA-15 catalysts for  
187 the chemoselective synthesis of methyl glycolate by dimethyl oxalate hydrogenation, *Catalysis*  
188 *Communications*, 40 (2013) 129-133.
- 189 [9] J. Zhou, X. Duan, L. Ye, J. Zheng, M.M.-J. Li, S.E. Tsang, Y. Yuan, Enhanced chemoselective  
190 hydrogenation of dimethyl oxalate to methyl glycolate over bimetallic Ag-Ni/SBA-15 catalysts, *Applied*  
191 *Catalysis A: General*, 505 (2015) 344-353.
- 192 [10] J. Zheng, X. Duan, H. Lin, Z. Gu, H. Fang, J. Li, Y. Yuan, Silver nanoparticles confined in carbon  
193 nanotubes: on the understanding of the confinement effect and promotional catalysis for the selective  
194 hydrogenation of dimethyl oxalate, *Nanoscale*, 8 (2016) 5959-5967.
- 195 [11] M. Ouyang, Y. Wang, J. Zhang, Y. Zhao, S. Wang, X. Ma, Three dimensional Ag/KCC-1 catalyst with  
196 a hierarchical fibrous framework for the hydrogenation of dimethyl oxalate, *RSC advances*, 6 (2016) 12788-  
197 12791.
- 198 [12] M. Hu, Y. Yan, X. Duan, L. Ye, J. Zhou, H. Lin, Y. Yuan, Effective anchoring of silver nanoparticles  
199 onto N-doped carbon with enhanced catalytic performance for the hydrogenation of dimethyl oxalate to  
200 methyl glycolate, *Catalysis Communications*, 100 (2017) 148-152.

- 201 [13] X.Y. Cheng, Jun, Synthesis of methyl glycolate from the hydrogenation of dimethyl oxalate on Ag/SiO<sub>2</sub>  
202 catalyst: the effects of Ag contents and promoters, Reaction kinetics, mechanisms and catalysis, 126 (2019).
- 203 [14] M. Ouyang, J. Wang, B. Peng, Y. Zhao, S. Wang, X. Ma, Effect of Ti on Ag catalyst supported on  
204 spherical fibrous silica for partial hydrogenation of dimethyl oxalate, Applied Surface Science, 466 (2019)  
205 592-600.
- 206 [15] G. Dong, Y. Cao, S. Zheng, J. Zhou, W. Li, F. Zaera, X. Zhou, Catalyst consisting of Ag nanoparticles  
207 anchored on amine-derivatized mesoporous silica nanospheres for the selective hydrogenation of dimethyl  
208 oxalate to methyl glycolate, Journal of Catalysis, 391 (2020) 155-162.
- 209 [16] X.-p. Duan, T. Chen, T. Chen, L. Huang, L. Ye, B.T. Lo, Y. Yuan, S.C.E. Tsang, Intercalating lithium  
210 into the lattice of silver nanoparticles boosts catalytic hydrogenation of carbon–oxygen bonds, Chemical  
211 Science, 12 (2021) 8791-8802.
- 212 [17] Z. Luo, X. Xu, G. Dong, Y. Cao, S. Hu, G. Ye, Y.-A. Zhu, J. Zhou, W. Li, X. Zhou, Regulating mesopore  
213 structures of support toward enhanced selective hydrogenation of dimethyl oxalate to methyl glycolate on Ag  
214 catalysts, Chemical Engineering Journal, 450 (2022) 138397.
- 215 [18] S. Cheng, T. Meng, D. Mao, X. Guo, J. Yu, Selective Hydrogenation of Dimethyl Oxalate to Methyl  
216 Glycolate over Boron-Modified Ag/SiO<sub>2</sub> Catalysts, Acs Omega, 7 (2022) 41224-41235.
- 217 [19] S. Cheng, T. Meng, D. Mao, X. Guo, J. Yu, Z. Ma, Ni-Modified Ag/SiO<sub>2</sub> Catalysts for Selective  
218 Hydrogenation of Dimethyl Oxalate to Methyl Glycolate, Nanomaterials, 12 (2022).
- 219 [20] J. Zou, X. Duan, X. Liu, L. Huang, X. Liu, J. Zuo, W. Jiao, H. Lin, L. Ye, Y. Yuan, Identifying the  
220 activity origin of silver catalysts induced by interfacial electron localization for regioselective CO bond  
221 hydrogenation, Chemical Engineering Journal, 454 (2023) 140110.
- 222 [21] J. Ding, M.H. Fan, Q. Zhong, A.G. Russell, Single-atom silver-manganese nanocatalysts based on atom-  
223 economy design for reaction temperature-controlled selective hydrogenation of bioresources-derivable diethyl  
224 oxalate to ethyl glycolate and acetaldehyde diethyl acetal, Applied Catalysis B-Environmental, 232 (2018)  
225 348-354.
- 226 [22] M. Guo, J. Ding, G. Ji, T. Xie, H. Pang, X. Li, Q. Zhong, Highly dispersed Ag/SiO<sub>2</sub> catalyst with weak  
227 metal-support interaction for diethyl oxalate hydrogenation to ethyl glycolate, Molecular Catalysis, 556 (2024)  
228 113898.
